# Supplementary material for: Transcriptome profiling of the floating-leaved aquatic plant Nymphoides peltata in response to flooding stress
Source: PubMed Central journal article supplement (PMC5282827; doi:10.1186/s12864-017-3515-y), 2017-01-31

**Additional file 1: The distribution of sequence lengths for the unigenes predicted from the pooling transcriptome assembly of *Nymphoides peltata***

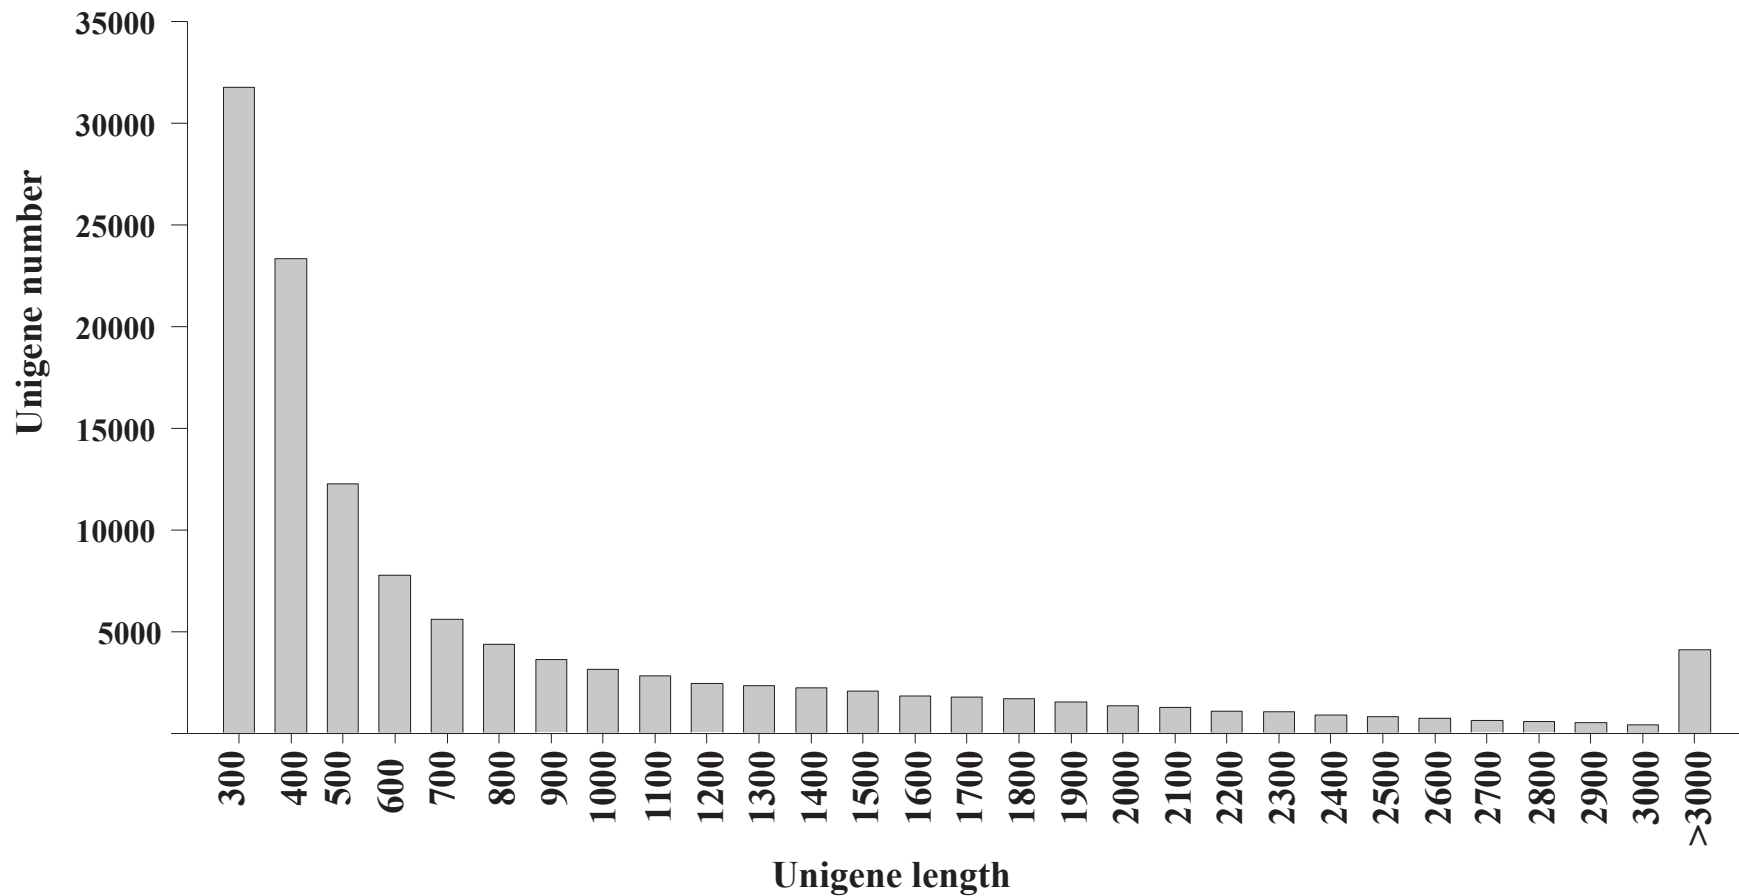

Supplement: 12864_2017_3515_MOESM1_ESM.pdf [file 12864_2017_3515_MOESM1_ESM.pdf]
