# Supplementary material for: Transcriptome profiling of the floating-leaved aquatic plant Nymphoides peltata in response to flooding stress
Source: PubMed Central journal article supplement (PMC5282827; doi:10.1186/s12864-017-3515-y), 2017-01-31
Supplement: 12864_2017_3515_MOESM5_ESM.pdf [file 12864_2017_3515_MOESM5_ESM.pdf]

**Additional file 5.** Unigene predictions from the *N. peltata* transcriptome assemblies based on three databases: Phytozome, NR (NCBI non-redundant proteins), and Non-coding RNA.

| Category   | Phytozome | NR    | Unannotated | Predicted CDs | Non-coding RNA |
|------------|-----------|-------|-------------|---------------|----------------|
| US         | 37942     | 37697 | 49377       | 45973         | 58             |
| TS         | 43183     | 42654 | 51745       | 48342         | 59             |
| US+TS pool | 52820     | 53744 | 69692       | 64753         | 43             |

**Note:** US means untreated sample, TS means treated sample. US+TS pool means the pooled sample using clean reads from treated and untreated sample. Predicted CDs mean the predicted coding gene number of the unannotated unigenes. Non-coding RNA indicates the number of unannotated unigenes in Phytozome and NR databases but annotated to the Non-coding RNA database.
