# Supplementary material for: Transcriptome profiling of the floating-leaved aquatic plant Nymphoides peltata in response to flooding stress
Source: PubMed Central journal article supplement (PMC5282827; doi:10.1186/s12864-017-3515-y), 2017-01-31
Supplement: 12864_2017_3515_MOESM7_ESM.pdf [file 12864_2017_3515_MOESM7_ESM.pdf]

**Additional file 7. Evolutionary analysis of molecular adaptation of aquatic plants compared with non-aquatic plants.**

| Unigene ID        | Gene name        | $\omega$ of aquatic plants | $\omega$ of non-aquatic plants | <i>P</i> value |
|-------------------|------------------|----------------------------|--------------------------------|----------------|
| TR6629_c1_g1_i1   | <i>ABCB19</i>    | 0.036874                   | 0.023494                       | 0.028          |
| TR10093_c0_g1_i2  | <i>HEMB1</i>     | 0.059597                   | 0.027808                       | 0.039          |
| TR60631_c0_g1_i1  | <i>ABCB1</i>     | 0.076195                   | 0.036114                       | 5.24E-06       |
| TR44321_c0_g1_i1  | <i>RAD50</i>     | 0.132137                   | 0.079645                       | 0.028          |
| CL3482Contig1     | <i>CCR3</i>      | 0.06995                    | 0.024871                       | 0.027          |
| TR21240_c1_g1_i2  | <i>ATJ13</i>     | 0.157833                   | 0.098019                       | 0.033          |
| CL680Contig1      | <i>SPE2</i>      | 0.056426                   | 0.023564                       | 0.033          |
| TR977_c2_g1_i1    | <i>At4g23740</i> | 0.121856                   | 0.048377                       | 0.026          |
| TR15463_c0_g1_i1  | <i>NAT2</i>      | 0.110638                   | 0.044651                       | 0.007          |
| TR47905_c0_g1_i5  | <i>STN8</i>      | 0.092683                   | 0.038917                       | 0.016          |
| CL4684Contig1     | <i>DXS</i>       | 0.05216                    | 0.025734                       | 0.007          |
| TR25987_c0_g1_i2  | <i>LNG2</i>      | 0.221001                   | 0.13413                        | 0.026          |
| TR29764_c0_g1_i3  | <i>At2g20050</i> | 0.122199                   | 0.053947                       | 2.62E-05       |
| TR52493_c0_g1_i2  | <i>CAT2</i>      | 0.05629                    | 0.028676                       | 0.018          |
| TR31717_c0_g1_i3  | unknown          | 0.352998                   | 0.072004                       | 0.008          |
| TR61766_c0_g1_i12 | unknown          | 0.170641                   | 0.080018                       | 0.015          |
| CL6880Contig1     | unknown          | 0.161334                   | 0.020046                       | 0.015          |
| TR49871_c1_g2_i2  | unknown          | 0.082749                   | 0.021676                       | 0.035          |

Note: *P* value indicated the *P* value corrected by false discovery rate at 5%.  $\omega$  means nonsynonymous to synonymous substitution rates
