# Supplementary material for: Transcriptome profiling of the floating-leaved aquatic plant Nymphoides peltata in response to flooding stress
Source: PubMed Central journal article supplement (PMC5282827; doi:10.1186/s12864-017-3515-y), 2017-01-31
Supplement: 12864_2017_3515_MOESM8_ESM.pdf [file 12864_2017_3515_MOESM8_ESM.pdf]

### Additional file 8. Primer sequences used in the qRT-PCR experiment.

| Unigene ID             | Gene name                                          | Abbr.        | Sequences (5' -3')                              |
|------------------------|----------------------------------------------------|--------------|-------------------------------------------------|
| d2.comp51231_c0_seq1   | glutathione<br>S-transferase                       | <i>GST</i>   | GGTCGAACCTGACTGGGAAGA<br>GGGCGTTGGGAAAGAATGG    |
| d2.comp347335_c0_seq1  | glutathione peroxidase                             | <i>GPX</i>   | GGTTGGACGCTTGTTTCATCAC<br>CGTTTGAGCCCTGTATCTTTG |
| CL3838contig1          | alcohol dehydrogenase                              | <i>ADH</i>   | CAACCCACTTGCTCCTCT<br>CCCTGAAACTCTAGCTCCTT      |
| d2.comp60738_c0_seq1   | lactate dehydrogenase                              | <i>LDH</i>   | GAACTTCTTAGATAGGGAGCAA<br>AGAACACTTCGCCATCGT    |
| d2.comp51785_c0_seq1   | alanine<br>aminotransferase                        | <i>AlaAT</i> | GGAACCTTGGTGCCTTATT<br>TTCTTGGTACACCTCGTCG      |
| d2.comp63174_c0_seq1   | aspartate transaminase                             | <i>AspAT</i> | AAGCTGAGCGGAGGATTG<br>AACTGGGATGTAGATTTGTGA     |
| d2.comp58507_c0_seq3   | photosystemI subunit<br>XI                         | <i>PsaL</i>  | GCTGCCGAGAAGTATCAAGTCA<br>GTATCCGTGAGCCAGACCAAC |
| d2.comp47781_c0_seq1   | photosynthetic<br>electron transport<br>ferredoxin | <i>PetF</i>  | ACGACACGTACATCCTCGACG<br>GGAGATGGTGCAGTCGGAGGTG |
| con2.comp52638_c0_seq3 | actin-like protein                                 | <i>Actin</i> | CTGTCGAAATGAGGCTGAA<br>GCAACTCTTCGCAATGGTA      |

Note: Sense means sense primer, Anti-sense means Anti-sense primer. Unigene con2.comp52638\_c0\_seq3 (i.e. actin-like gene) was used as an internal control to standardize the results. Abbr. represents abbreviation.
